# Supplementary material for: An Assessment of the Diversity of Culturable Bacteria from Main Root of Sugar Beet
Source: PubMed Central journal article supplement (PMC4103529; doi:10.1264/jsme2.me13182), 2014-04-30
Supplement: 29_220_s1.pdf [file 29_220_s1.pdf]

1

Table S1. Characteristics of field soil used in the present study

| pH<br>(H <sub>2</sub> O) | Humid<br>content<br>(%) | Total<br>nitrogen<br>(%) | NO <sub>3</sub> -N<br>(mg/100g) | NH <sub>4</sub> -N<br>(mg/100g) | P <sub>2</sub> O <sub>5</sub><br>(mg/100g) | Phosphate<br>absorption<br>coefficient | K <sub>2</sub> O<br>(mg/100g) | CaO<br>(mg/100g) | MgO<br>(mg/100g) | CEC<br>(me/100g) |
|--------------------------|-------------------------|--------------------------|---------------------------------|---------------------------------|--------------------------------------------|----------------------------------------|-------------------------------|------------------|------------------|------------------|
| 6.3                      | 6.2                     | 0.32                     | 0.55                            | 0.34                            | 16.5                                       | 1786                                   | 39.9                          | 441.8            | 51.1             | 31.9             |

2

3

4

5

6

7

8

9

10

11

Table S2. Phylogenetic compositions of bacterial isolate collections derived from main roots of sugar beet

| Taxa (%) <sup>a</sup>            | Bacterial isolate collections |                 |      |           |
|----------------------------------|-------------------------------|-----------------|------|-----------|
|                                  | R2A                           |                 | HM   |           |
|                                  | SU <sup>b</sup>               | CO <sup>b</sup> | SU   | CO        |
| Proteobacteria                   | 77.0                          | 75.2            | 77.2 | 72.5      |
| Alphaproteobacteria              | 48.1                          | 52.2            | 46.7 | 64.8*     |
| Rhodospirillales                 | 0.0                           | 0.0             | 1.1  | 1.1       |
| Rhodospirillaceae                | 0.0                           | 0.0             | 1.1  | 1.1       |
| <i>Inquilinus</i>                | 0.0                           | 0.0             | 1.1  | 1.1       |
| Sphingomonadales                 | 9.6                           | 0.0             | 9.8  | 0.0       |
| Sphingomonadaceae                | 9.1                           | 11.2            | 9.8  | 5.5       |
| <i>Sphingobium</i>               | 0.5                           | 0.6             | 2.2  | 0.0       |
| <i>Sphingopyxis</i>              | 4.3                           | 4.3             | 1.1  | 0.0       |
| <i>Novosphingobium</i>           | 1.1                           | 1.2             | 4.3  | 2.2       |
| <i>Sphingomonas</i>              | 3.2                           | 5.0             | 2.2  | 3.3       |
| Erythrobacteraceae               | 0.5                           | 0.0             | 0.0  | 0.0       |
| unclassified Erythrobacteraceae  | 0.5                           | 0.0             | 0.0  | 0.0       |
| Caulobacterales                  | 3.7                           | 1.2             | 6.5  | 3.3       |
| Caulobacteraceae                 | 3.7                           | 1.2             | 6.5  | 3.3       |
| <i>Brevundimonas</i>             | 1.1                           | 0.6             | 1.1  | 0.0       |
| <i>Caulobacter</i>               | 2.7                           | 0.6             | 4.3  | 3.3       |
| <i>Asticcacaulis</i>             | 0.0                           | 0.0             | 1.1  | 0.0       |
| Rhizobiales                      | 34.8                          | 39.8            | 28.3 | 54.9***†  |
| Beijerinckiaceae                 | 0.5                           | 0.6             | 0.0  | 0.0       |
| <i>Beijerinckia</i>              | 0.5                           | 0.6             | 0.0  | 0.0       |
| Xanthobacteraceae                | 2.1                           | 4.3             | 0.0  | 0.0       |
| <i>Labrys</i>                    | 2.1                           | 4.3             | 0.0  | 0.0       |
| Rhizobiaceae                     | 3.2                           | 1.2             | 6.5  | 1.1       |
| <i>Rhizobium</i>                 | 3.2                           | 1.2             | 6.5  | 1.1       |
| Bradyrhizobiaceae                | 9.6                           | 14.9            | 6.5  | 15.4      |
| <i>Afipia</i>                    | 0.0                           | 0.6             | 0.0  | 0.0       |
| <i>Bradyrhizobium</i>            | 1.6                           | 1.2             | 0.0  | 1.1       |
| <i>Bosea</i>                     | 5.3                           | 5.6             | 6.5  | 11.0      |
| unclassified Bradyrhizobiaceae   | 2.7                           | 7.5             | 0.0  | 3.3       |
| Phyllobacteriaceae               | 9.1                           | 6.2             | 5.4  | 7.7       |
| <i>Phyllobacterium</i>           | 0.0                           | 0.6             | 0.0  | 0.0       |
| <i>Aminobacter</i>               | 0.0                           | 0.6             | 0.0  | 1.1       |
| <i>Mesorhizobium</i>             | 8.0                           | 5.0             | 4.3  | 6.6       |
| unclassified Phyllobacteriaceae  | 1.1                           | 0.0             | 1.1  | 0.0       |
| Hyphomicrobiaceae                | 9.1                           | 12.4            | 6.5  | 29.7***†† |
| <i>Devosia</i>                   | 9.1                           | 12.4            | 6.5  | 29.7***†† |
| Methylobacteriaceae              | 0.5                           | 0.0             | 1.1  | 0.0       |
| <i>Methylobacterium</i>          | 0.5                           | 0.0             | 1.1  | 0.0       |
| unclassified Rhizobiales         | 0.5                           | 0.0             | 2.2  | 1.1       |
| unclassified Alphaproteobacteria | 0.0                           | 0.0             | 1.1  | 0.0       |

1

2

Table S2. Continued

| Taxa (%) <sup>a</sup>          | Bacterial isolate collections |                 |                   |                    |
|--------------------------------|-------------------------------|-----------------|-------------------|--------------------|
|                                | R2A                           |                 | HM                |                    |
|                                | SU <sup>b</sup>               | CO <sup>b</sup> | SU                | CO                 |
| Betaproteobacteria             | 9.6                           | 6.8             | 20.7 <sup>†</sup> | 7.7 <sup>*</sup>   |
| Burkholderiales                | 9.6                           | 6.8             | 20.7 <sup>†</sup> | 7.7 <sup>*</sup>   |
| Burkholderiales_incertae_sedis | 0.0                           | 0.6             | 0.0               | 0.0                |
| <i>Aquabacterium</i>           | 0.0                           | 0.6             | 0.0               | 0.0                |
| Burkholderiaceae               | 0.0                           | 0.0             | 1.1               | 0.0                |
| <i>Burkholderia</i>            | 0.0                           | 0.0             | 1.1               | 0.0                |
| Oxalobacteraceae               | 0.5                           | 0.6             | 1.1               | 0.0                |
| <i>Herminiimonas</i>           | 0.5                           | 0.6             | 0.0               | 0.0                |
| <i>Herbaspirillum</i>          | 0.0                           | 0.0             | 1.1               | 0.0                |
| Comamonadaceae                 | 9.1                           | 5.6             | 18.5 <sup>†</sup> | 7.7 <sup>*</sup>   |
| <i>Polaromonas</i>             | 5.9                           | 1.9             | 9.8               | 3.3                |
| <i>Roseateles</i>              | 0.0                           | 0.0             | 0.0               | 1.1                |
| <i>Variovorax</i>              | 0.5                           | 3.1             | 7.6 <sup>††</sup> | 3.3                |
| <i>Acidovorax</i>              | 1.1                           | 0.0             | 0.0               | 0.0                |
| <i>Pelomonas</i>               | 0.5                           | 0.0             | 0.0               | 0.0                |
| <i>Curvibacter</i>             | 0.5                           | 0.0             | 0.0               | 0.0                |
| unclassified Comamonadaceae    | 0.5                           | 0.6             | 1.1               | 0.0                |
| Gammaproteobacteria            | 18.2                          | 16.1            | 5.4 <sup>††</sup> | 0.0 <sup>*††</sup> |
| Pseudomonadales                | 0.5                           | 0.6             | 1.1               | 0.0                |
| Pseudomonadaceae               | 0.5                           | 0.6             | 1.1               | 0.0                |
| <i>Rhizobacter</i>             | 0.5                           | 0.6             | 0.0               | 0.0                |
| <i>Pseudomonas</i>             | 0.0                           | 0.0             | 1.1               | 0.0                |
| Xanthomonadales                | 17.6                          | 15.5            | 4.3 <sup>††</sup> | 0.0 <sup>††</sup>  |
| Xanthomonadaceae               | 17.6                          | 15.5            | 4.3 <sup>††</sup> | 0.0 <sup>††</sup>  |
| <i>Rhodanobacte</i>            | 0.5                           | 0.6             | 1.1               | 0.0                |
| <i>Lysobacter</i>              | 5.9                           | 6.2             | 3.3               | 0.0 <sup>†</sup>   |
| <i>Dokdonella</i>              | 1.6                           | 1.9             | 0.0               | 0.0                |
| <i>Pseudoxanthomonas</i>       | 9.1                           | 6.8             | 0.0 <sup>††</sup> | 0.0 <sup>††</sup>  |
| <i>Stenotrophomonas</i>        | 0.5                           | 0.0             | 0.0               | 0.0                |
| unclassified Proteobacteria    | 1.1                           | 0.0             | 4.3               | 0.0                |

Table S2. Continued

| Taxa (%) <sup>a</sup>         | Bacterial isolate collections |                 |                    |                    |
|-------------------------------|-------------------------------|-----------------|--------------------|--------------------|
|                               | R2A                           |                 | HM                 |                    |
|                               | SU <sup>b</sup>               | CO <sup>b</sup> | SU                 | CO                 |
| Actinobacteria                | 16.6                          | 15.5            | 9.8                | 12.1               |
| Actinobacteria                | 16.6                          | 15.5            | 9.8                | 12.1               |
| Actinomycetales               | 16.6                          | 15.5            | 9.8                | 12.1               |
| Streptomycetaceae             | 0.5                           | 1.2             | 2.2                | 0.0                |
| <i>Streptomyces</i>           | 0.5                           | 1.2             | 2.2                | 0.0                |
| Nocardioideae                 | 9.6                           | 5.6             | 0.0 <sup>††</sup>  | 0.0 <sup>†</sup>   |
| <i>Nocardioides</i>           | 4.8                           | 1.2             | 0.0 <sup>†</sup>   | 0.0                |
| <i>Aeromicrobium</i>          | 3.2                           | 3.1             | 0.0                | 0.0                |
| <i>Kribbella</i>              | 0.5                           | 0.0             | 0.0                | 0.0                |
| <i>Marmoricola</i>            | 0.5                           | 0.0             | 0.0                | 0.0                |
| unclassified Nocardioideae    | 0.5                           | 1.2             | 0.0                | 0.0                |
| Microbacteriaceae             | 2.1                           | 6.2             | 4.3                | 4.4                |
| <i>Pseudoclavibacter</i>      | 0.0                           | 0.0             | 0.0                | 1.1                |
| <i>Leifsonia</i>              | 0.0                           | 0.6             | 0.0                | 1.1                |
| <i>Microbacterium</i>         | 2.1                           | 3.1             | 4.3                | 2.2                |
| <i>Salinibacterium</i>        | 0.0                           | 0.6             | 0.0                | 0.0                |
| <i>Agrococcus</i>             | 0.0                           | 1.9             | 0.0                | 0.0                |
| Nocardiaceae                  | 0.0                           | 0.0             | 0.0                | 1.1                |
| <i>Nocardia</i>               | 0.0                           | 0.0             | 0.0                | 1.1                |
| Mycobacteriaceae              | 4.3                           | 2.5             | 2.2                | 6.6                |
| <i>Mycobacterium</i>          | 4.3                           | 2.5             | 2.2                | 6.6                |
| Pseudonocardiaceae            | 0.0                           | 0.0             | 1.1                | 0.0                |
| <i>Amycolatopsis</i>          | 0.0                           | 0.0             | 1.1                | 0.0                |
| Bacteroidetes                 | 4.3                           | 5.6             | 13.0 <sup>††</sup> | 15.4 <sup>††</sup> |
| Flavobacteria                 | 0.0                           | 0.6             | 0.0                | 1.1                |
| Flavobacteriales              | 0.0                           | 0.6             | 0.0                | 1.1                |
| Flavobacteriaceae             | 0.0                           | 0.6             | 0.0                | 1.1                |
| <i>Flavobacterium</i>         | 0.0                           | 0.6             | 0.0                | 1.1                |
| Sphingobacteria               | 4.3                           | 5.0             | 13.0 <sup>††</sup> | 14.3 <sup>†</sup>  |
| Sphingobacteriales            | 4.3                           | 5.0             | 13.0 <sup>††</sup> | 14.3 <sup>†</sup>  |
| Chitinophagaceae              | 1.6                           | 1.2             | 3.3                | 3.3                |
| <i>Sediminibacterium</i>      | 0.0                           | 0.6             | 0.0                | 0.0                |
| <i>Chitinophaga</i>           | 0.0                           | 0.0             | 1.1                | 1.1                |
| <i>Niabella</i>               | 0.5                           | 0.0             | 0.0                | 1.1                |
| <i>Lacibacter</i>             | 0.5                           | 0.0             | 1.1                | 0.0                |
| <i>Niastella</i>              | 0.0                           | 0.0             | 1.1                | 0.0                |
| unclassified Chitinophagaceae | 0.5                           | 0.6             | 0.0                | 1.1                |
| Sphingobacteriaceae           | 1.6                           | 2.5             | 7.6 <sup>†</sup>   | 3.3                |
| <i>Sphingobacterium</i>       | 0.0                           | 0.6             | 0.0                | 0.0                |
| <i>Mucilaginibacter</i>       | 0.0                           | 0.0             | 4.3 <sup>††</sup>  | 1.1                |
| <i>Pedobacter</i>             | 1.6                           | 1.9             | 3.3                | 2.2                |
| Cytophagaceae                 | 1.1                           | 1.2             | 2.2                | 7.7 <sup>††</sup>  |
| <i>Dyadobacter</i>            | 1.1                           | 1.2             | 2.2                | 7.7 <sup>††</sup>  |

1

2

Table S2. Continued

| Taxa (%) <sup>a</sup>   | Bacterial isolate collections |                   |     |     |
|-------------------------|-------------------------------|-------------------|-----|-----|
|                         | R2A                           |                   | HM  |     |
|                         | SU <sup>b</sup>               | CO <sup>b</sup>   | SU  | CO  |
| Firmicutes              | 0.0                           | 3.7 <sup>**</sup> | 0.0 | 0.0 |
| Bacilli                 | 0.0                           | 3.7 <sup>**</sup> | 0.0 | 0.0 |
| Bacillales              | 0.0                           | 3.7 <sup>**</sup> | 0.0 | 0.0 |
| Bacillaceae 1           | 0.0                           | 1.9               | 0.0 | 0.0 |
| <i>Bacillus</i>         | 0.0                           | 1.9               | 0.0 | 0.0 |
| Paenibacillaceae        | 0.0                           | 1.9               | 0.0 | 0.0 |
| <i>Paenibacillus</i>    | 0.0                           | 1.9               | 0.0 | 0.0 |
| Verrucomicrobia         | 2.1                           | 0.0               | 0.0 | 0.0 |
| Verrucomicrobiae        | 2.1                           | 0.0               | 0.0 | 0.0 |
| Verrucomicrobiales      | 2.1                           | 0.0               | 0.0 | 0.0 |
| Verrucomicrobiaceae     | 2.1                           | 0.0               | 0.0 | 0.0 |
| <i>Haloferula</i>       | 1.1                           | 0.0               | 0.0 | 0.0 |
| <i>Verrucomicrobium</i> | 1.1                           | 0.0               | 0.0 | 0.0 |

<sup>a</sup>Sequences were classified using the Classifier of Ribosomal Database Project II release 10 with a confidence threshold 80%.

<sup>b</sup>SU and CO stand for the surface and core parts of main roots of sugar beet, respectively.

<sup>\*</sup>, <sup>\*\*</sup> indicate statistical significance examined by the [Library Compare of Ribosomal Database Project II](#) at  $p < 0.05$  and  $p < 0.01$ , respectively, between SU and CO in each medium.

<sup>†</sup>, <sup>††</sup> indicate statistical significance examined by the [Library Compare of Ribosomal Database Project II](#) at  $p < 0.05$  and  $p < 0.01$ , respectively, between R2A and HM in each part of main roots.

1 **Figure legends**

2

3 Fig. S1. Phylogenic distribution of OTUs at species level for main root-associated  
4 bacteria in sugar beet. OTUs (Operational taxonomic units) were defined at 99%  
5 sequence identity by using MOTHUR. *Aquifex pyrophilus* (M83548) was used as an out  
6 group for the dendrogram. OTUs were expressed as prefixes derived from phylum  
7 identity (Symbols; AP, *Alphaproteobacteria*; BP, *Betaproteobacteria*; GP,  
8 *Gammaproteobacteria*; B, *Bacteroidetes*; F, *Firmicutes*; A, *Actinobacteria*; V,  
9 *Verrucomicrobia*, with consecutive numbers). The table indicates the relative abundance  
10 (%) of isolates belonging to each OTU in each collection and the result of BLAST  
11 search using representative sequence. SU and CO stand for the surface and core parts of  
12 main roots of sugar beet, respectively. \*, \*\* indicate statistical significance examined by  
13 Fisher's exact test at  $p<0.05$  and  $p<0.01$ , respectively, between SU and CO in each  
14 medium. †, †† indicate statistical significance examined by Fisher's exact test at  $p<0.05$   
15 and  $p<0.01$ , respectively, between R2A and HM in each of SU and CO.

16

17

18

19

20

21

22

23

24

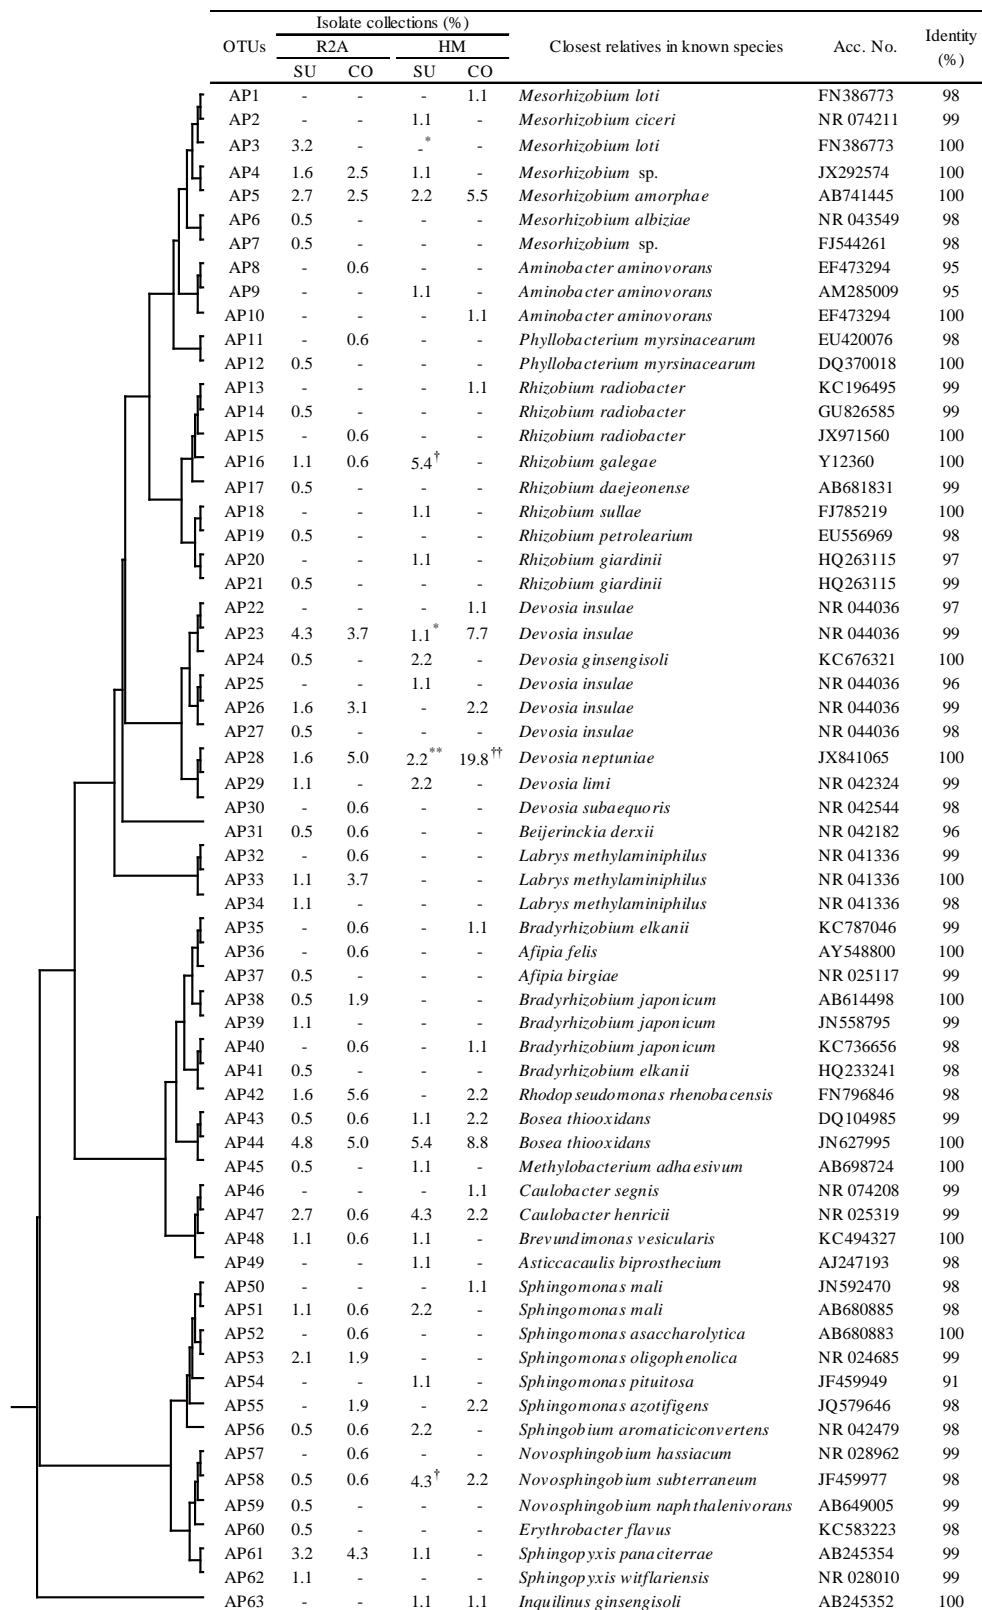

1 Fig. S1 K. Okazaki



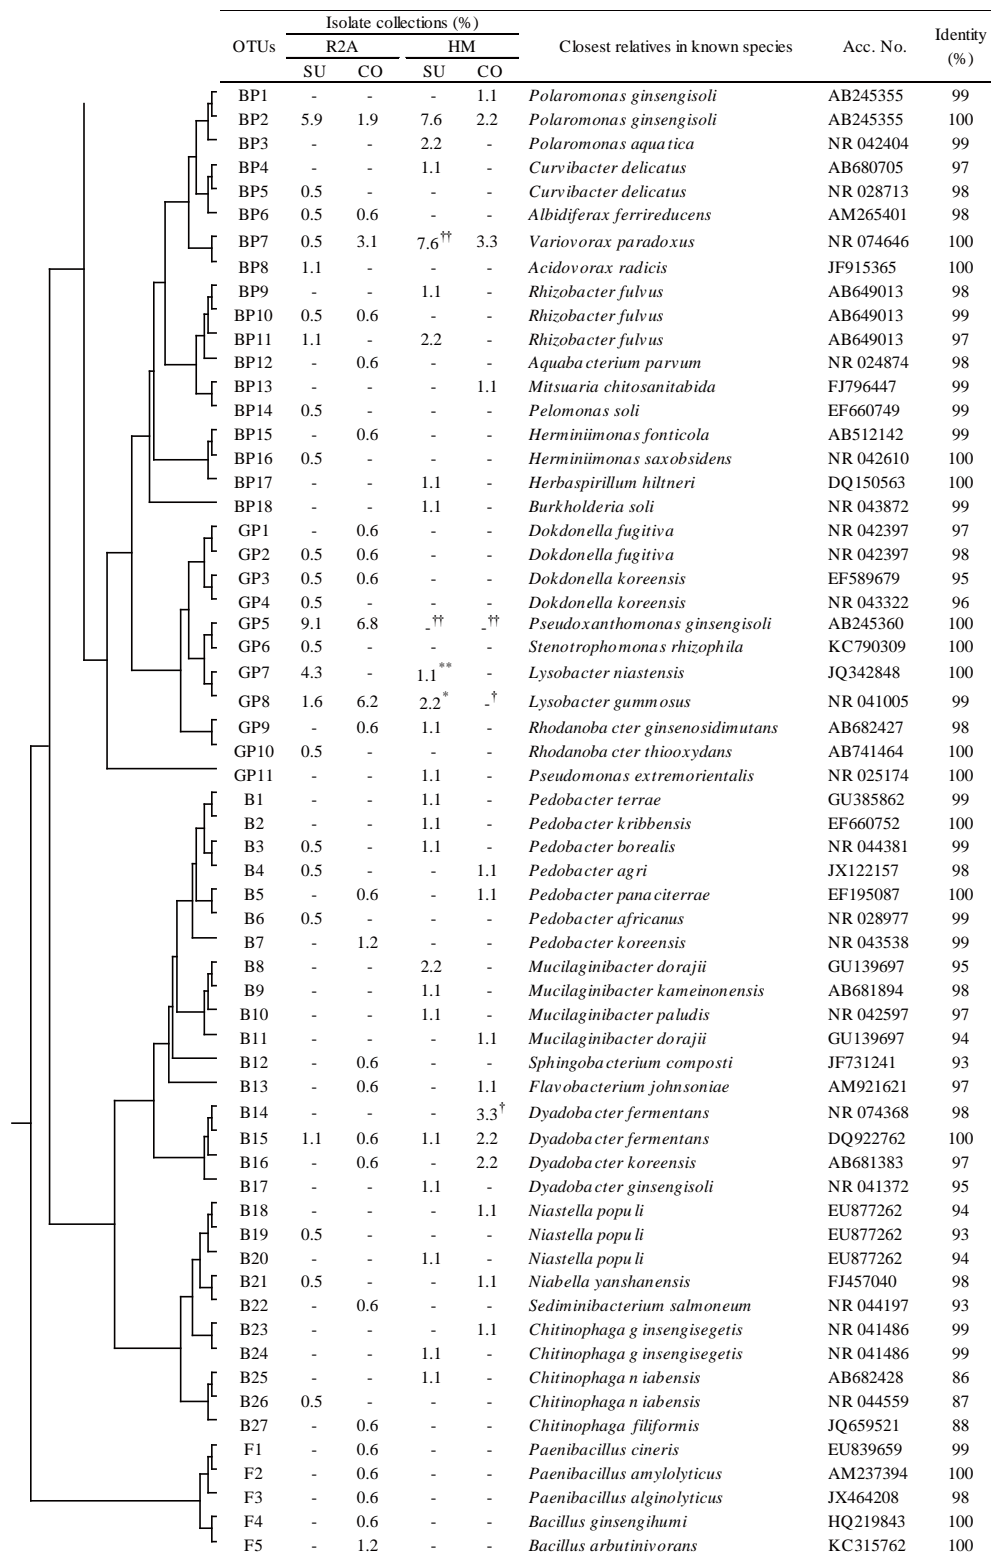

1 Fig. S1 Continued K. Okazaki

2

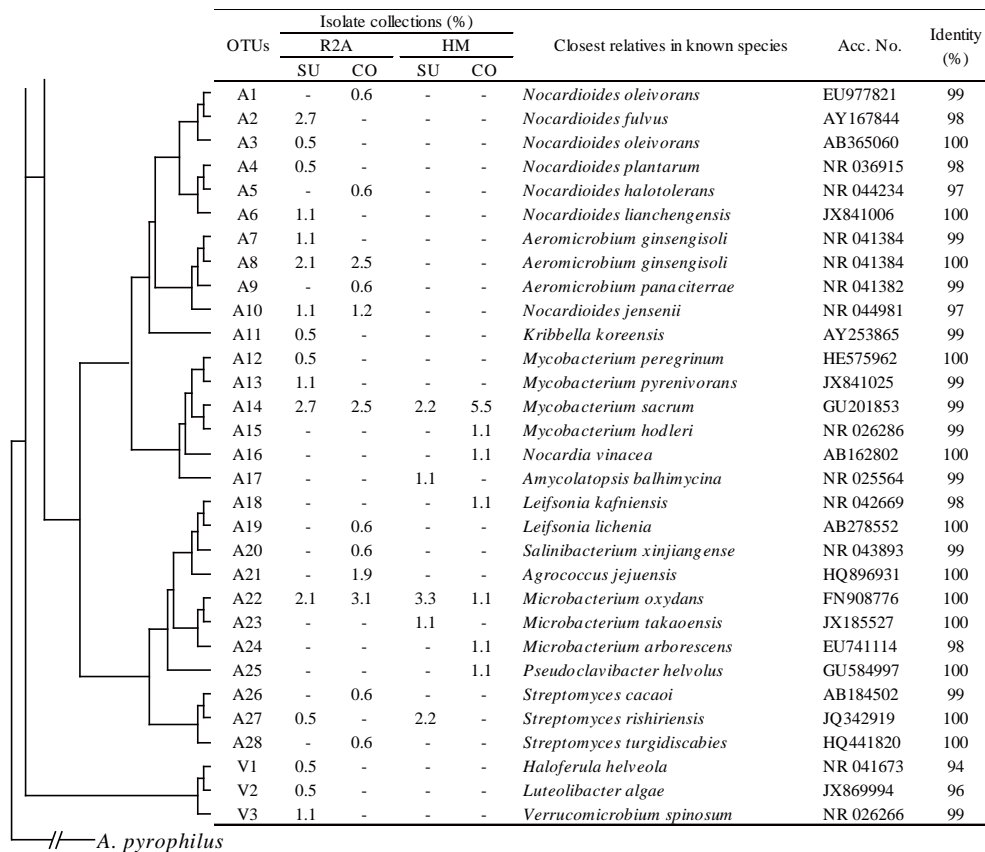

1 Fig. S1 Continued K. Okazaki

2
